# Supplementary material for: A neutral molecular-based layered magnet [Fe(C2O4)(CH3OH)]n exhibiting magnetic ordering at TN ≈ 23 K
Source: Royal Society of Chemistry journal article supplement (doi:10.1039/b805776a), 2008-01-01
Supplement: b805776a.pdf [file b805776a.pdf]

## A Neutral Molecular-based Layered Magnet

**[Fe(C<sub>2</sub>O<sub>4</sub>)(CH<sub>3</sub>OH)]<sub>n</sub> Exhibiting Magnetic Ordering at  $T_N \approx$**

**23K**

**Bin Zhang,<sup>\*†</sup> Yan Zhang,<sup>§</sup> Jinbiao Zhang,<sup>†</sup> Junchao Li,<sup>†</sup> Daoben Zhu<sup>\*†</sup>**

### Supplementary materials

$a = 9.5865(8)\text{Å}$ ,  $b = 6.0542(5)\text{Å}$ ,  $c = 9.5851(9)\text{Å}$

$\alpha = 90^\circ$ ,  $\beta = 103.269(3)^\circ$ ,  $\gamma = 90^\circ$

$V = 541.45(8)\text{Å}^3$

$Pc$

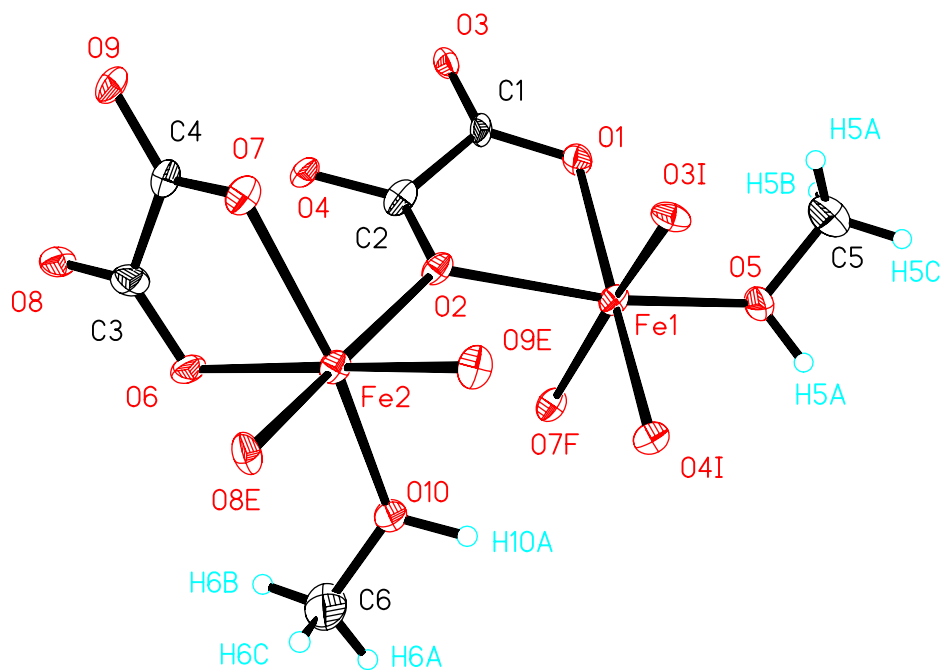

ORTEP drawing of title compound with 30% ellipsoid.

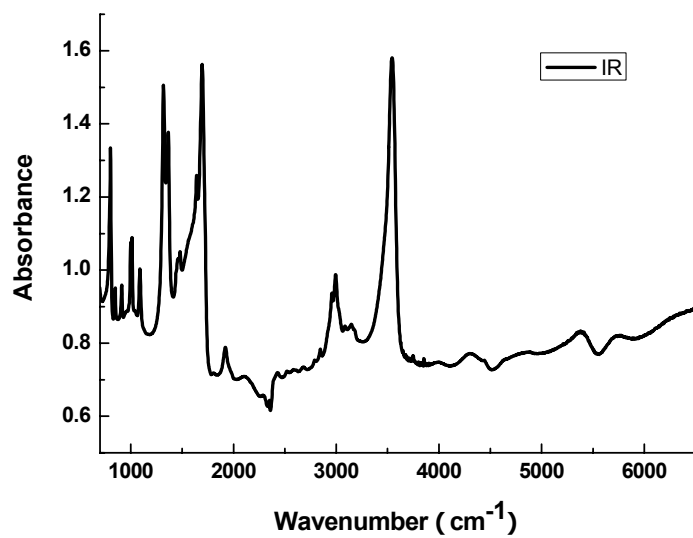

IR spectra of title compound on Micro-IR spectrometer.

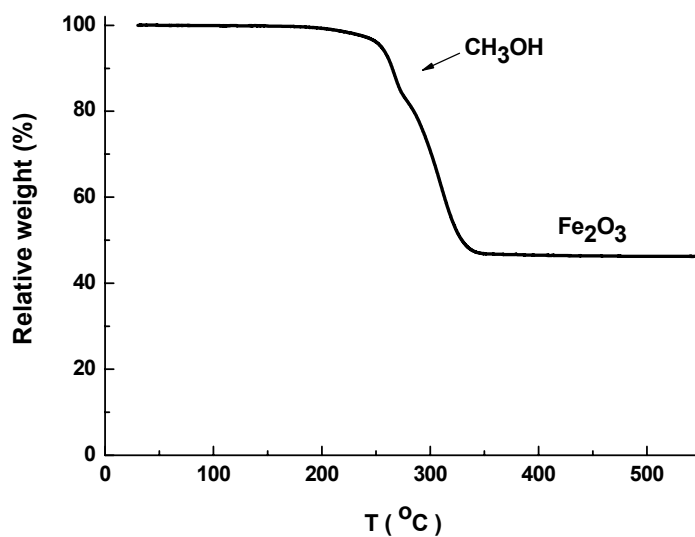

The TGA run of title compound.

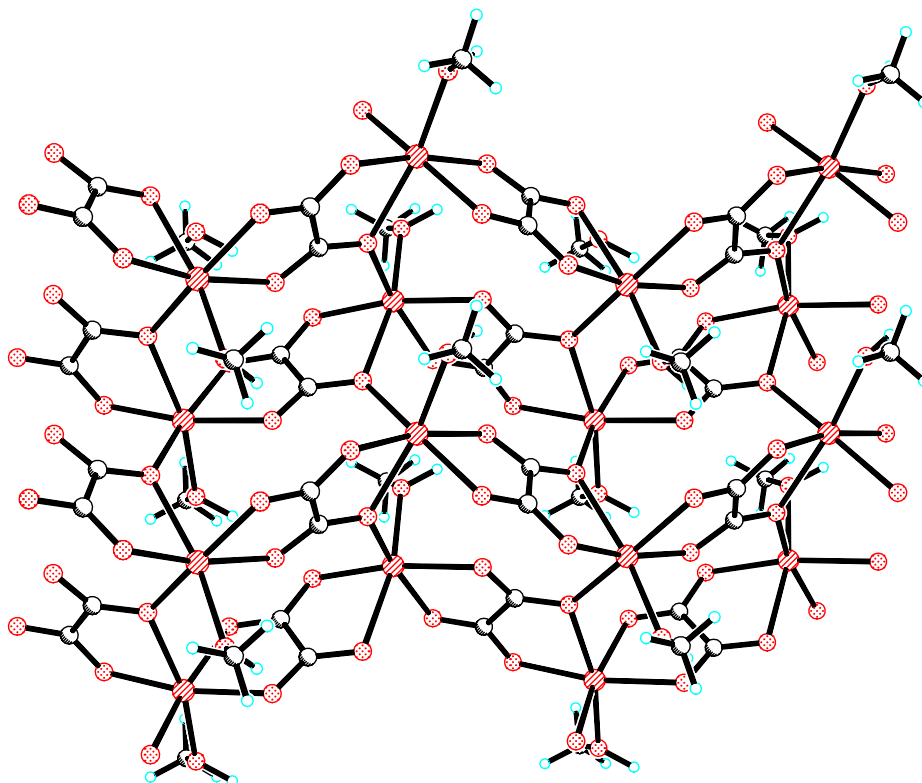

Layered structure of title compound projected along *a* axis.

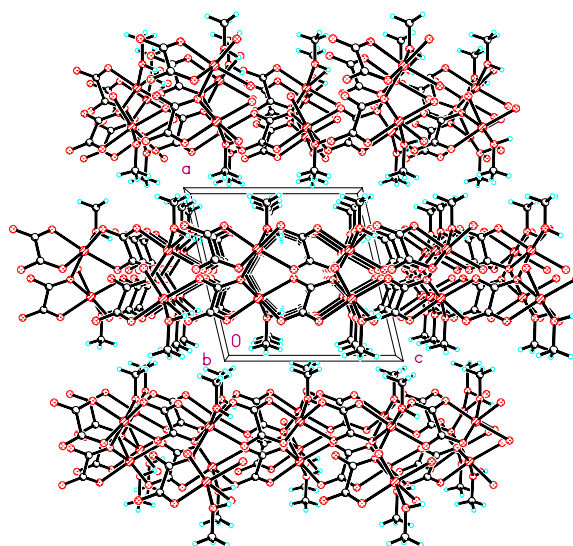

Packing diagram of title compound viewed along *b* axis.

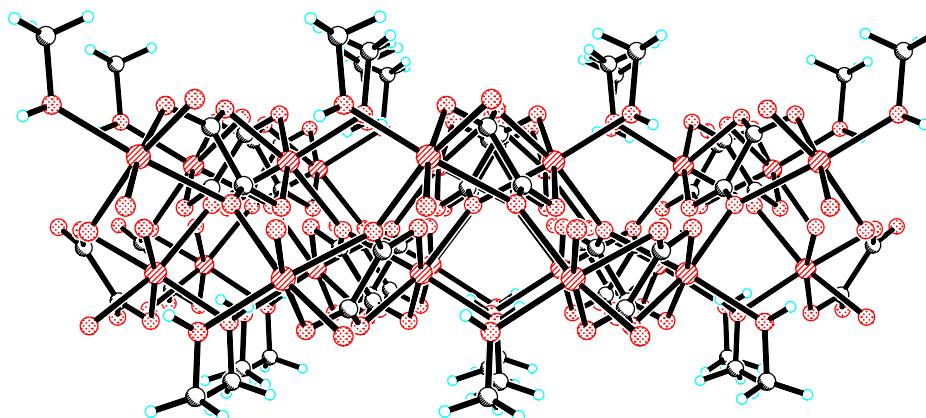

Packing diagram of title compound viewed along *c* axis.

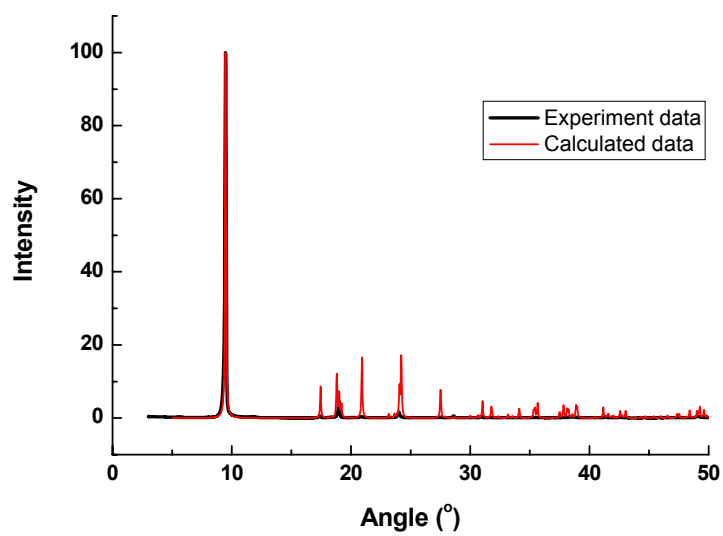

X-ray powder diffraction pattern of polycrystals used for magnetic measurement and stimulated data from CCDC684183 with Cu  $K\alpha$  radiation.

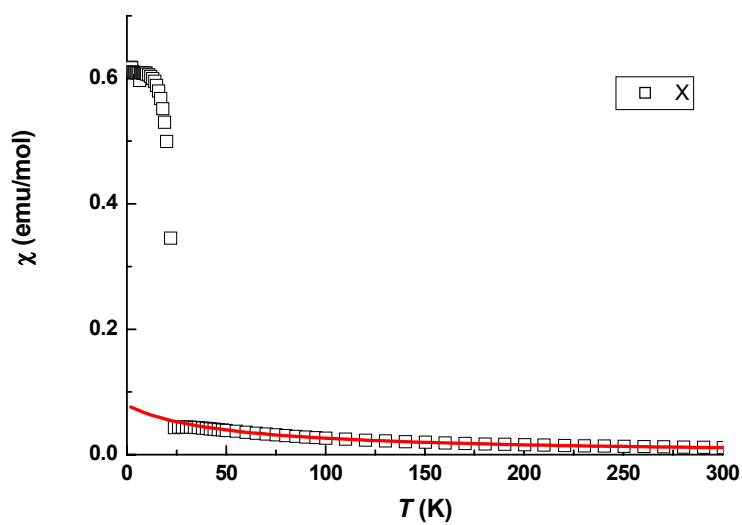

The  $\chi$ - $T$  plot of title compound. Empty square is experiment data, and solid red is fitting data.

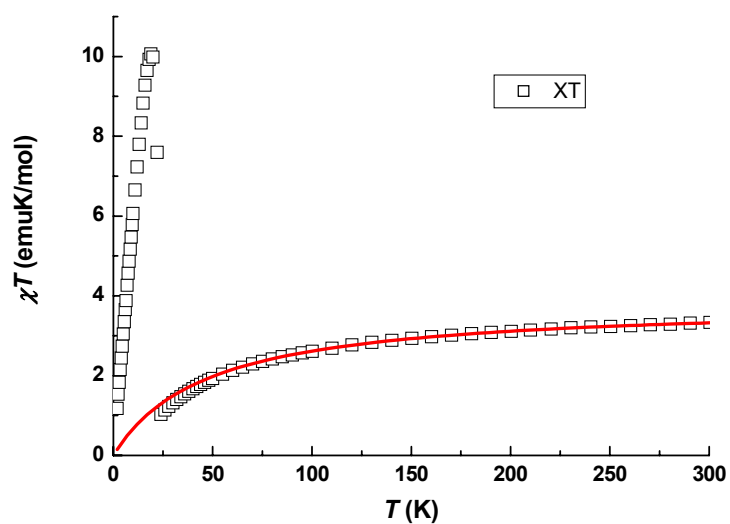

The  $\chi T$ - $T$  plot of title compound. Empty square is experiment data, and solid red line is fitting data.

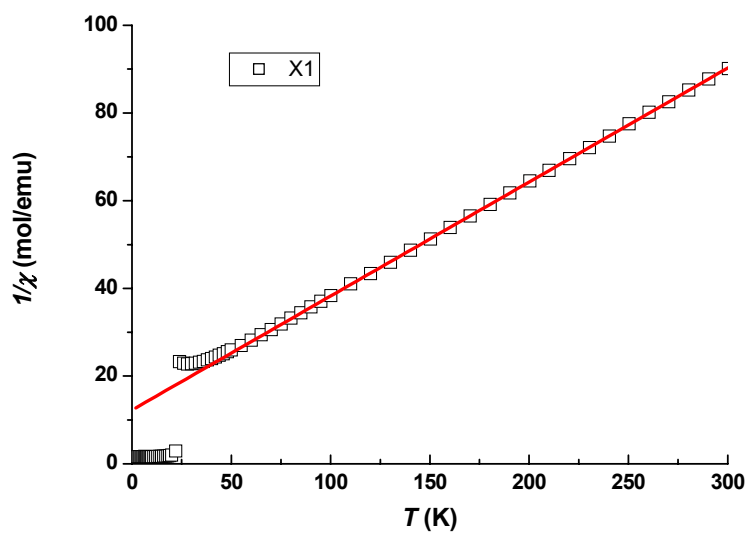

The  $1/\chi$ - $T$  plot of title compound. Empty square is experiment data, and solid red line is fitting data

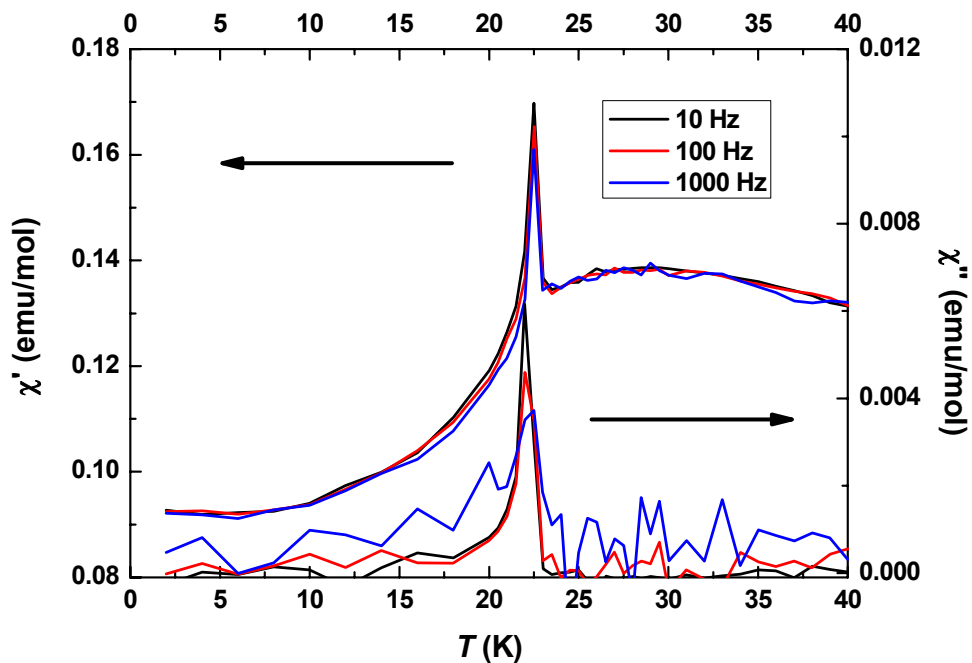

AC susceptibility measurement under 10, 100, 1000 Hz.
